# Supplementary material
Source: PubMed Central journal article supplement (PMC6511791)
Supplement: ajtr0011-2413-f5.pdf [file ajtr0011-2413-f5.pdf]

## GAS5/miR-222-3p/p27 facilitates the endometrial carcinoma

**Table S1.** Primers sequences for qRT-PCR and sequences of siRNA

|                   | Sequences 5'-3'                        |
|-------------------|----------------------------------------|
| GAS5              | Forward, 5'-ACAGGCATTAGACAGAAAGC-3'    |
|                   | Reverse, 5'-TACCCAAGCAAGTCATCCA-3'     |
| miR-222-3p        | Forward, 5'-GACACTTGTTAGCTGGTATTGC-3'  |
|                   | Reverse, 5'-CTTTCTGCTTGGCTCTGTTCTAT-3' |
| p27               | Forward, 5'-TTGGGGCAAGGCAAAGGA-3'      |
|                   | Reverse, 5'-TTGCAATTGGAGTCATCATCG-3'   |
| GAPDH             | Forward, 5'-CTGGCCAATGAAACCGAAAG-3'    |
|                   | Reverse, 5'-ACGAGGCGGCAATACAGACA-3'    |
| miR-222-3p mimics | Forward, 5'-UGGCAGUGUCUUAGCUGGUUG-3'   |
|                   | Reverse, 5'-ACCAGCUAAGACACUGCCAUU-3'   |
